# Supplementary material for: The Use of Dolomite to Produce a Magnesium Potassium Phosphate Matrix for Radioactive Waste Conditioning
Source: MDPI journal article supplement (doi:10.3390/en16145513), 2023-07-20
Supplement: s1 [file s1]

Supplementary Materials:

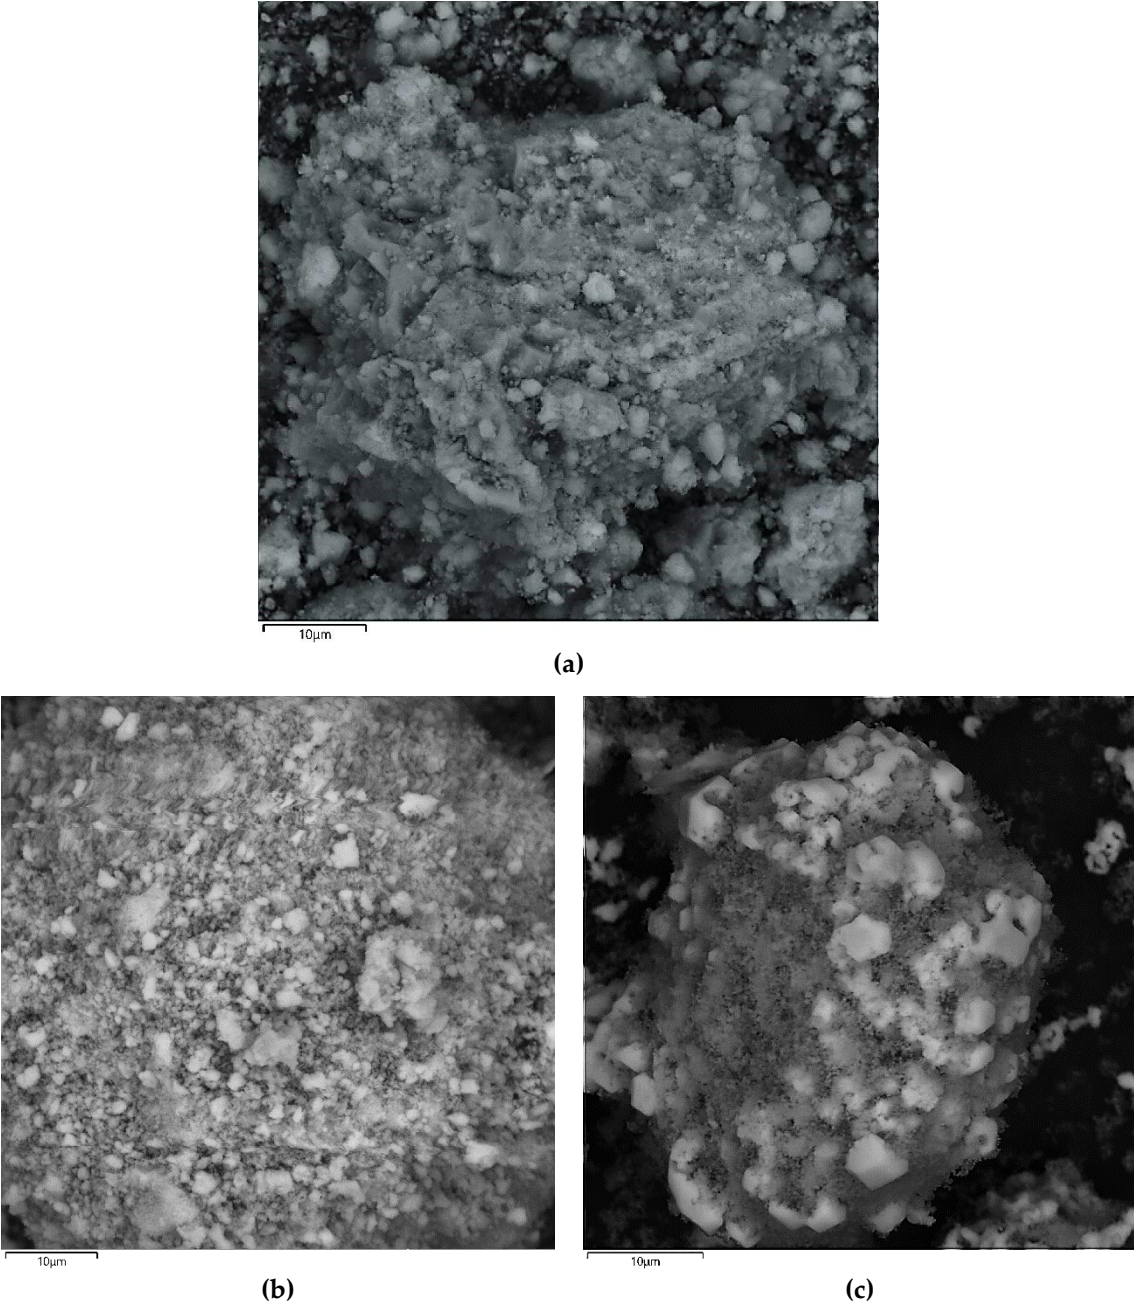

**Figure S1.** Scanning electron microscope (SEM) images of dolomite samples in backscattered electrons: initial **(a)**, calcined at 720 °C **(b)**, and calcined at 750 °C **(c)**.

**Table S1.** Average data of elemental composition (at%) of dolomite powder samples according to EDS date.

| Element | Initial (Figure S1a) |            | Calcined at 720 °C (Figure S1b) |            | Calcined at 750 °C (Figure S1c) |            |
|---------|----------------------|------------|---------------------------------|------------|---------------------------------|------------|
|         | White phase          | Gray phase | White phase                     | Gray phase | White phase                     | Gray phase |
| Mg      | 23.91                | 33.45      | 26.25                           | 30.94      | 13.69                           | 36.89      |
| Ca      | 26.09                | 16.55      | 23.75                           | 19.06      | 36.31                           | 13.06      |
| O       | 50.00                | 50.00      | 50.01                           | 50.00      | 50.00                           | 50.05      |

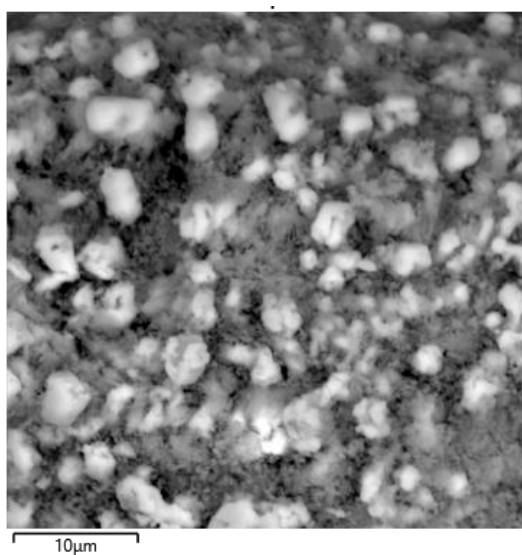

(a)

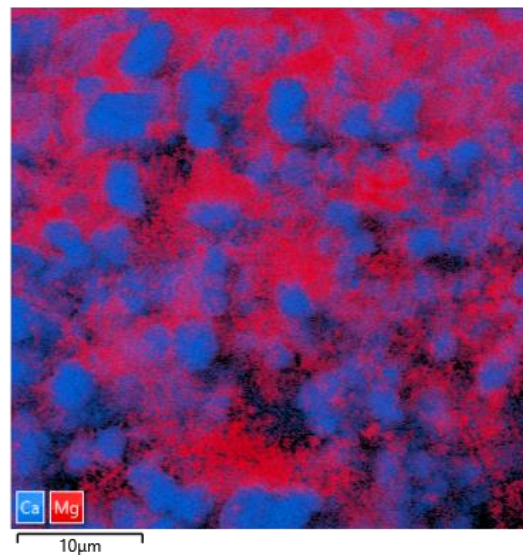

(b)

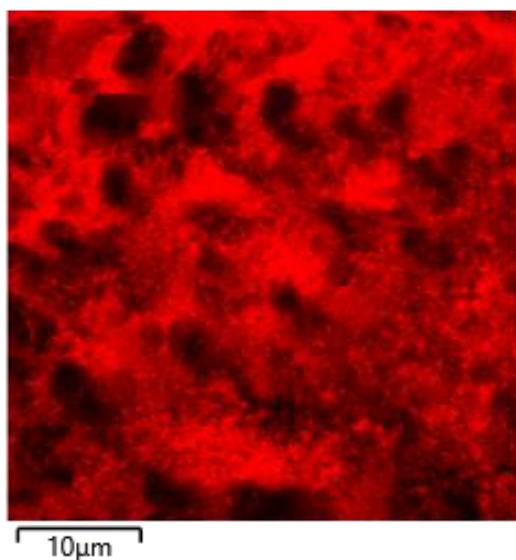

(c)

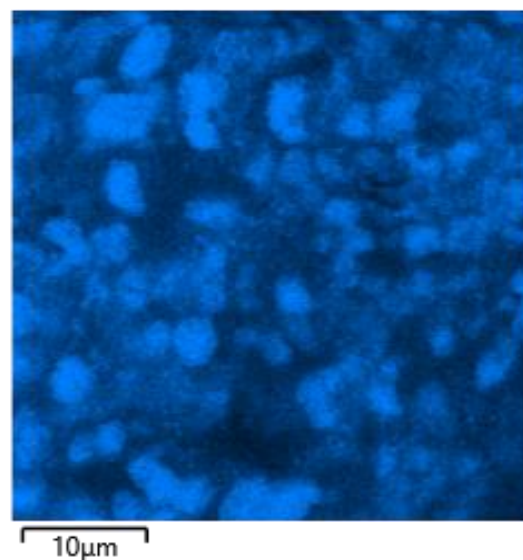

(d)

**Figure S2.** SEM image (a) and multilayer image (b) of the dolomite sample calcined at 750 °C with elemental distribution maps of magnesium (c) and calcium (d) in sample.
